# Supplementary material for: Reconstructing the Single-Cell Spatiotemporal Dynamics of Glioblastoma Invasion
Source: Research Square preprint supplement (doi:10.21203/rs.3.rs-6163153/v1), 2025-03-25
Supplement: Supplementary file 1 [file 8ac9c7e7f29f5b0efb2dea0a.xlsx]

## Sheet: HGCC cultures
Sr. No.	Cell culture	Diagnosis	Control	In vitro drug treatment	Ex vivo drug treatments	Age at diagnosis	Sex	Survival diagnosis (days)	Cell Passage	Subtype	Primary/Recurrent	Patient status
1	U3013MG	Glioblastoma, grade IV	Yes	Yes	Yes	78	F	122	14-22	Proneural	Primary	Dead
2	U3028MG	Glioblastoma, grade IV	Yes	No	Yes	72	F	496	20-30	Proneural	Primary	Dead
3	U3054MG	Glioblastoma, grade IV	Yes	No	Yes	60	F	611	20-30	Mesenchymal	Recurrent	Dead
4	U3179MG	Glioblastoma, grade IV	Yes	Yes	Yes	62	M	474	15-30	Classical	Recurrent	Dead
5	U3180MG	Glioblastoma, grade IV	Yes	Yes	Yes	80	M	267	15-30	Classical	Primary	Dead
6	U3220MG	Glioblastoma, grade IV	Yes	Yes	Yes	69	F	492	15-30	Mesenchymal	Primary	Dead

## Sheet: Video annotations
video_index	original_file	label_in_paper		description	slowdown	gamma
1	BS6_3013_mouse2zoom_A02.mp4	Supplementary videos		GlioTrace: AI-Driven Glioblastoma Invasion Mapping in Live Brain Slices	1.5	1
1	Supplementary video 1.mp4	Supplementary video 1A		Vasculature labeling and Bioavalability of TL-DyLight 594	6	1
1	Supplementary video 2.mp4	Supplementary video 1B		Collective Tumor Cell Movement (U3013MG, Proneural) – Coordinated perivascular migration streams of glioblastoma cells.	2	0.75
1	Supplementary video 3.mp4	Supplementary video 1C		Perivascular Glioblastoma Migration (U3028MG, Proneural) – Tumor cells navigating along blood vessels.	2	0.75
1	Supplementary video 4.mp4	Supplementary video 1D		Collective Tumor Cell Movement (U3220MG, Mesenchymal) – Perivascular migration of tumor cells in subventricular zone.	2	1
1	Supplementary video 5.mp4	Supplementary video 1E		High-Speed Tumor Cell Translocation (U3054MG, Mesenchymal) – Fast-moving cells invading brain tissue.	2	0.75
1	Supplementary video 6.mp4	Supplementary video 1F		Diffuse Tumor Cell Migration (U3180MG, Classical) – Glioblastoma cells dispersing through the brain.	2	1
1	Supplementary video 7.mp4	Supplementary video 1G		White Matter-Infiltrating Tumor Cells(U3179MG, Classical) – Invasion along neural tracts.	2	1
2	BS6_3013_mouse2zoom_A02.mp4	Supplementary videos		GlioTrace: AI-Driven Glioblastoma Invasion Mapping in Live Brain Slices	1	1
2	Supplementary video 8.mp4	Supplementary video 2A		Branching Cell Migration (U3013MG) – Glioblastoma cells extending protrusions in invasion.	2	1
2	Supplementary video 9.mp4	Supplementary video 2B		Perivascular Translocation (U3013MG) – Cancer cells utilizing blood vessels as pathways.	2	1
2	Supplementary video 10.mp4	Supplementary video 2C		Locomotion (U3180MG) – Cancer cell migrating unidiractional with long leading-edge protrution.	2	1
2	Supplementary video 11.mp4	Supplementary video 2D		Morphological invasion Switching (U3013MG) - Transitioning between invasion states	2	1
2	Supplementary video 12.mp4	Supplementary video 2E		Altered Migration Routes (U3180MG) – Cells shifting between vascular and diffuse movement.	2	1
2	Supplementary video 13.mp4	Supplementary video 2F		Glioblastoma tumor cell demonstrating vessel guided migration for brain invasion.	2	1
3	BS6_3013_mouse2zoom_A02.mp4	Supplementary videos		GlioTrace: AI-Driven Glioblastoma Invasion Mapping in Live Brain Slices	1.5	1
3	Supplementary video 14.mp4	Supplementary video 3A		U3013MG tumor cells disorganizing vessels at tumor invasive edge during brain invasion.	2	1
3	Supplementary video 15.mp4	Supplementary video 3B		U3028MG tumor cells disorganizing vessels at tumor invasive edge during brain invasion.	2	1
3	Supplementary video 16.mp4	Supplementary video 3C		U3220MG tumor cells disorganizing vessels at tumor invasive edge during brain invasion.	2	1
3	Supplementary video 17.mp4	Supplementary video 3D		U3054MG tumor cells disorganizing vessels at tumor invasive edge during brain invasion.	2	1
3	Supplementary video 18.mp4	Supplementary video 3E		Vascular network remains unaffected during brain invasion by diffusely growing U3180MG tumor cells.	2	1
3	Supplementary video 19.mp4	Supplementary video 3F		Vascular network remains unaffected during brain invasion by diffusely growing U3179MG tumor cells.	2	1
3	Supplementary video 20.mp4	Supplementary video 3G		U3013MG tumor cell colocalizing with brain resident microglia divides simultaneously with glioblastoma tumor cell throughout the interaction period.	1	1
4	BS6_3013_mouse2zoom_A02.mp4	Supplementary videos		GlioTrace: AI-Driven Glioblastoma Invasion Mapping in Live Brain Slices	1.5	1
4	Supplementary video 21.mp4	Supplementary video 4A		U3013MG model - Inhibition of tumor cell migration and invasion in DMSO, dasatinib and thapsigargin treated slices.	2	1
4	Supplementary video 22.mp4	Supplementary video 4B		U3180MG model - Inhibition of tumor cell migration and invasion in DMSO, dasatinib and thapsigargin treated slices.	2	1
4	Supplementary video 23.mp4	Supplementary video 4C		U3054MG model - Inhibition of tumor cell migration and invasion in DMSO, dasatinib and thapsigargin treated slices.	2	1
4	Supplementary video 24.mp4	Supplementary video 4D		U3220MG model - Inhibition of tumor cell migration and invasion in DMSO, dasatinib and thapsigargin treated slices.	2	1
4	Supplementary video 25.mp4	Supplementary video 4E		U3179MG model - Inhibition of tumor cell migration and invasion in DMSO, dasatinib and thapsigargin treated slices.	2	1
